# Supplementary material for: Incidence Estimates of Acute Q Fever and Spotted Fever Group Rickettsioses, Kilimanjaro, Tanzania, from 2007 to 2008 and from 2012 to 2014
Source: PubMed Central journal article supplement (PMC8832940; doi:10.4269/ajtmh.20-1036), 2021-12-20
Supplement: tpmd201036.SD1.pdf [file tpmd201036.SD1.pdf]

**Supplemental Table 1.** Calculation of incidence of acute Q fever and spotted fever group rickettsioses (SFGR), Moshi Municipal and Moshi Rural Districts, Tanzania 2007-2008.

| Age group, years | KCMC crude cases | Q fever IFA performance multiplier*          | KCMC hospital multiplier | KCMC adjusted cases | MRRH crude cases | Q fever IFA performance multiplier*          | MRRH hospital multiplier | MRRH adjusted cases | Total adjusted cases <sup>‡</sup> | Paired sera multiplier | Enrollment logistics multiplier <sup>§</sup> | Estimated annual cases | Population | Annual incidence per 100,000 persons |
|------------------|------------------|----------------------------------------------|--------------------------|---------------------|------------------|----------------------------------------------|--------------------------|---------------------|-----------------------------------|------------------------|----------------------------------------------|------------------------|------------|--------------------------------------|
| 0-4              | 4                | 0.95                                         | 11.65                    | 44                  | N/A              | 0.95                                         | 2.96                     | N/A                 | 44                                | 1.79                   | 2.20                                         | 175                    | 72663      | 241                                  |
| 5-14             | 1                | 0.95                                         | 36.10                    | 34                  | N/A              | 0.95                                         | 2.64                     | N/A                 | 34                                | 1.31                   | 2.20                                         | 99                     | 195442     | 51                                   |
| ≥15              | 4                | 0.95                                         | 23.14                    | 88                  | 7                | 0.95                                         | 2.71                     | 18                  | 53                                | 1.76                   | 2.20                                         | 206                    | 329994     | 62                                   |
| Overall          |                  |                                              |                          |                     |                  |                                              |                          |                     |                                   |                        |                                              | 480                    | 598099     | 80                                   |
| Age group, years | KCMC crude cases | SFGR IFA performance multiplier <sup>†</sup> | KCMC hospital multiplier | KCMC adjusted cases | MRRH crude cases | SFGR IFA performance multiplier <sup>†</sup> | MRRH hospital multiplier | MRRH adjusted cases | Total adjusted cases <sup>‡</sup> | Paired sera multiplier | Enrollment logistics multiplier <sup>§</sup> | Estimated annual cases | Population | Annual incidence per 100,000 persons |
| 0-4              | 12               | 1.06                                         | 11.65                    | 149                 | N/A              | 1.06                                         | 2.96                     | N/A                 | 149                               | 2.07                   | 2.20                                         | 677                    | 72663      | 931                                  |
| 5-14             | 1                | 1.06                                         | 36.10                    | 38                  | N/A              | 1.06                                         | 2.64                     | N/A                 | 38                                | 1.40                   | 2.20                                         | 119                    | 195442     | 61                                   |
| ≥15              | 0                | 1.06                                         | 23.14                    | 0                   | 14               | 1.06                                         | 2.71                     | 40                  | 20                                | 1.94                   | 2.20                                         | 86                     | 329994     | 26                                   |
| Overall          |                  |                                              |                          |                     |                  |                                              |                          |                     |                                   |                        |                                              | 882                    | 598099     | 147                                  |

\* Q fever IFA performance multiplier was the specificity (95%) multiplied by the inverse of the sensitivity (100%).

† SFGR IFA performance multiplier was the specificity (100%) multiplied by the inverse of the sensitivity (94%).

‡ Total adjusted cases for those ≥15 years old was the sum of KCMC and MRRH cases divided by 2 to correct for recruitment of participants from two sentinel sites. Participants who were 0-4 years old and 5-14 years old were only recruited from one sentinel site, KCMC. Thus, total adjusted cases for the two age categories was the same as KCMC adjusted cases for those categories.

§ Enrollment logistics multiplier was the product of three individual multipliers related to enrollment procedures: time multiplier, enrollment multiplier, and study duration multiplier. For 2007-2008, time multiplier was 1.4, enrollment multiplier was 1.51, and study duration adjustment was 1.05. The enrollment logistics multiplier was 2.20 and not 2.21 because it was the product of each individual multiplier prior to rounding.

Abbreviations: IFA, indirect immunofluorescence assay; SFGR, spotted fever group rickettsioses; KCMC, Kilimanjaro Christian Medical Centre; MRRH, Mawenzi Regional Referral Hospital

**Supplemental Table 2.** Calculation of incidence of acute Q fever and spotted fever group rickettsioses (SFGR), Moshi Municipal and Moshi Rural Districts, Tanzania 2012-2014. Based on the question, ‘What will you do if you have fever for  $\geq 3$  days?’

| Age group, years | KCMC crude cases | Q fever IFA performance multiplier* | KCMC hospital multiplier | KCMC adjusted cases | MRRH inpatient crude cases | MRRH outpatient crude cases | Sum of MRRH cases | Q fever IFA performance multiplier* | MRRH hospital multiplier | MRRH adjusted cases | Total adjusted cases <sup>‡</sup> | Paired sera | Enrollment logistics multiplier <sup>§</sup> | Annual Cases | Population | Annual Incidence per 100,000 persons |
|------------------|------------------|-------------------------------------|--------------------------|---------------------|----------------------------|-----------------------------|-------------------|-------------------------------------|--------------------------|---------------------|-----------------------------------|-------------|----------------------------------------------|--------------|------------|--------------------------------------|
| 0-4              | N/A              | 0.95                                | 11.65                    | N/A                 | 7                          | 13                          | 20                | 0.95                                | 2.96                     | 56                  | 56                                | 2.43        | 1.29                                         | 177          | 70807      | 250                                  |
| 5-14             | N/A              | 0.95                                | 36.10                    | N/A                 | 6                          | 1                           | 7                 | 0.95                                | 2.64                     | 18                  | 18                                | 1.28        | 1.29                                         | 29           | 155528     | 19                                   |
| $\geq 15$        | 5                | 0.95                                | 23.14                    | 110                 | 17                         | 3                           | 20                | 0.95                                | 2.71                     | 52                  | 81                                | 1.52        | 1.29                                         | 159          | 424694     | 37                                   |
| Overall          |                  |                                     |                          |                     |                            |                             |                   |                                     |                          |                     |                                   |             |                                              | 365          | 651029     | 56                                   |

  

| Age group, years | KCMC crude cases | SFGR IFA performance multiplier <sup>†</sup> | KCMC hospital multiplier | KCMC adjusted cases | MRRH inpatient crude cases | MRRH outpatient crude cases | Sum of MRRH cases | SFGR IFA performance multiplier <sup>†</sup> | MRRH hospital multiplier | MRRH adjusted cases | Total adjusted cases <sup>‡</sup> | Paired sera | Enrollment logistics multiplier <sup>§</sup> | Annual Cases | Population | Annual Incidence per 100,000 persons |
|------------------|------------------|----------------------------------------------|--------------------------|---------------------|----------------------------|-----------------------------|-------------------|----------------------------------------------|--------------------------|---------------------|-----------------------------------|-------------|----------------------------------------------|--------------|------------|--------------------------------------|
| 0-4              | N/A              | 1.06                                         | 11.65                    | N/A                 | 13                         | 15                          | 28                | 1.06                                         | 2.96                     | 88                  | 88                                | 2.43        | 1.29                                         | 276          | 70807      | 390                                  |
| 5-14             | N/A              | 1.06                                         | 36.10                    | N/A                 | 1                          | 1                           | 2                 | 1.06                                         | 2.64                     | 6                   | 6                                 | 1.28        | 1.29                                         | 9            | 155528     | 6                                    |
| $\geq 15$        | 6                | 1.06                                         | 23.14                    | 148                 | 14                         | 7                           | 21                | 1.06                                         | 2.71                     | 61                  | 104                               | 1.52        | 1.29                                         | 205          | 424694     | 48                                   |
| Overall          |                  |                                              |                          |                     |                            |                             |                   |                                              |                          |                     |                                   |             |                                              | 490          | 651029     | 75                                   |

\* Q fever IFA performance multiplier was the specificity (95%) multiplied by the inverse of the sensitivity (100%).

† SFGR IFA performance multiplier was the specificity (100%) multiplied by the inverse of the sensitivity (94%).

‡ Total adjusted cases for those  $\geq 15$  years old was the sum of KCMC and MRRH cases divided by 2 to correct for recruitment of participants from two sentinel sites. Participants who were 0-4 years old and 5-14 years old were only recruited from one sentinel site, MRRH; thus, the total adjusted cases for these two age categories was the same as MRRH adjusted cases for these two age categories.

§ Enrollment logistics multiplier was the product of three distinct multipliers related to enrollment procedures: time multiplier, enrollment multiplier, and study duration multiplier. For 2012-2014, time multiplier was 1.4, enrollment multiplier was 2.09, and study duration multiplier was 0.44.

Abbreviations: IFA, indirect immunofluorescence assay; SFGR, spotted fever group rickettsioses; KCMC, Kilimanjaro Christian Medical Centre; MRRH, Mawenzi Regional Referral Hospital
